# Supplementary material
Source: PubMed Central journal article supplement (PMC4788538)

### Hippocampal $\beta$ -actin

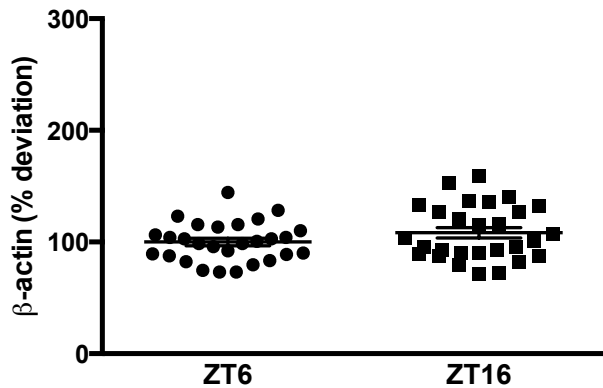

### Hippocampal GAPDH

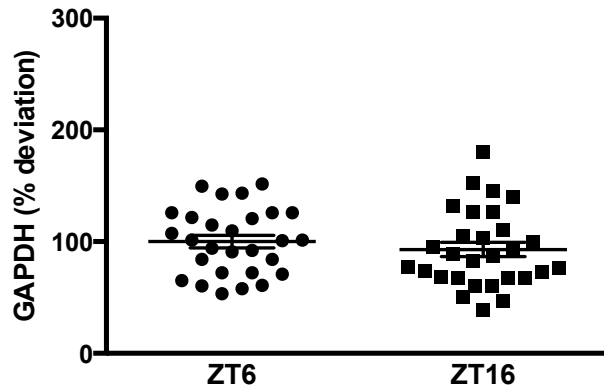

### Microglia $\beta$ -actin

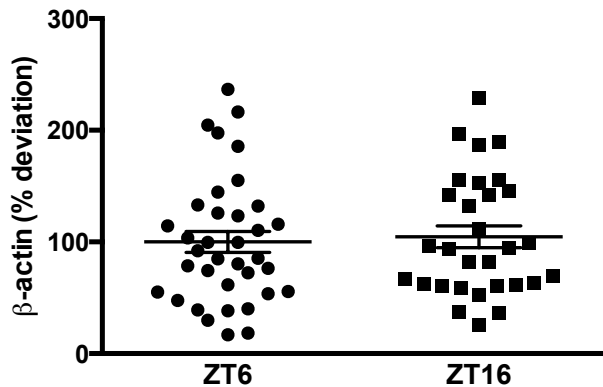

### Microglia GAPDH

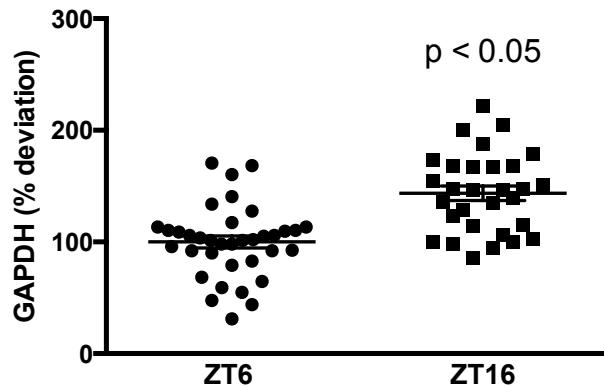

Supplement: NIHMS753120-supplement.pdf [file NIHMS753120-supplement.pdf]
